# Supplementary material for: Amino acids attached to 2′-amino-LNA: synthesis and excellent duplex stability
Source: Royal Society of Chemistry journal article supplement (doi:10.1039/c0ob00532k), 2010-11-03

# Electronic Supplementary Material (ESI) for:

---

## **Amino acids attached to 2'-amino-LNA: Synthesis and increased duplex stability**

Marie W. Johannsen, Lia Crispino, Michael C. Wamberg, Neerja Kalra, and Jesper Wengel\*

Nucleic Acid Center, Department of Physics and Chemistry, University of Southern Denmark,  
Campusvej 55, DK-5230 Odense M, Denmark.  
E-mail: [jwe@ifk.sdu.dk](mailto:jwe@ifk.sdu.dk)

**Table S1 - MALDI TOF Mass spectrometry data for modified ONs**

**Table S2 - Overview of yields for synthesis of modified ONs**

**S3 - NMR spectra**

**Table S1 - MALDI TOF Mass spectrometry data for modified ONs**

Instrumentation and conditions as described in journal article

| Modification                             | Calculated mass [M+H] <sup>+</sup> | Found mass [M+H] <sup>+</sup> |
|------------------------------------------|------------------------------------|-------------------------------|
| 2'-amino-LNA                             | 2781.9                             | 2780.7                        |
| gly                                      | 2838.9                             | 2838.4                        |
| (gly) <sub>2</sub>                       | 2896.0                             | 2893.8                        |
| (gly) <sub>3</sub>                       | 2953.0                             | 2952.5                        |
| (gly) <sub>4</sub>                       | 3010.1                             | 3006.8                        |
| (gly) <sub>5</sub>                       | 3067.1                             | 3068.1                        |
| gly-pro                                  | 2936.0                             | 2933.6                        |
| gly-lys                                  | 2967.1                             | 2966.7                        |
| gly-gly-lys                              | 3024.2                             | 3023.3                        |
| gly-lys(lys) <sub>2</sub>                | 3223.4                             | 3224.0                        |
| acetyl                                   | 2823.9                             | 2823.3                        |
| C16                                      | 3020.3                             | 3018.5                        |
| 3 x 2'-amino-LNA                         | 2835.9                             | 2836.7                        |
| 3 x acetyl                               | 2961.9                             | 2960.8                        |
| 3 x C16                                  | 3551.1                             | 3550.0                        |
| 3 x gly                                  | 3007.1                             | 3005.6                        |
| Complementary strands with modifications |                                    |                               |
| 2 x 2'-amino-LNA                         | 2737.9                             | 2736.8                        |
| 2 x gly                                  | 2849.9                             | 2847.7                        |

**Table S2 - Overview of yields for synthesis of modified ONs**

Synthesis was carried out on either 0.2  $\mu\text{mol}$  or 1  $\mu\text{mol}$  scale (A). Intermediate numbers represent approximate scale of synthesis where a 1  $\mu\text{mol}$  scale was divided into several portions. The UV absorbance at 260 nm ( $\text{OD}_{260}$ ) was measured for 1.00 mL solutions (C). Final yield of all modified oligonucleotides (D) was calculated from (C) using a calculated extinction coefficient of  $92.3 \text{ OD}_{260} \mu\text{mol}^{-1}$  for the sequences 5'-G**X**G A**X**A **X**GC-3' and a calculated extinction coefficient of  $90.6 \text{ OD}_{260} \mu\text{mol}^{-1}$  for the complementary sequences 5'-GCA **X**A**X** CAC-3' where **X** = DNA-T or modified monomers. Extinction coefficients were found using the oligo calculator at [www.ribotask.com](http://www.ribotask.com). Percentage yields of the total synthesis of both the ONs and peptide couplings (F) was calculated from (A) and (D). The yield of on-column peptide couplings, where these were carried out, was calculated from (D) and an initial synthetic scale which takes into account the yield of the oligonucleotide synthesis (B). These percentage yields are recorded in column (E).

| Modification                             | A:<br>ON synthetic scale<br>/ $\mu\text{mol}$ | B:<br>Yield of ON<br>synthesis (DMT<br>cation<br>measurements) | C:<br>Final yield after<br>peptide coupling<br>and purification<br>/ $\text{OD}_{260}\text{mL}^{-1}$ | D<br>Final yield after<br>peptide coupling<br>and purification /<br>$\mu\text{mol}$ | E:<br>Yield of peptide<br>coupling | F:<br>Overall yield of<br>whole synthesis /<br>% |
|------------------------------------------|-----------------------------------------------|----------------------------------------------------------------|------------------------------------------------------------------------------------------------------|-------------------------------------------------------------------------------------|------------------------------------|--------------------------------------------------|
| 2'-amino-LNA                             | 0.20                                          | >100%                                                          | 9.2                                                                                                  | 0.10                                                                                |                                    | 50%                                              |
| gly                                      | 0.20                                          | 94%                                                            | 4.3                                                                                                  | 0.05                                                                                |                                    | 23%                                              |
| (gly) <sub>2</sub>                       | 0.25                                          | >100%                                                          | 4.2                                                                                                  | 0.05                                                                                | 18%                                | 18%                                              |
| (gly) <sub>3</sub>                       | 0.25                                          | >100%                                                          | 7.4                                                                                                  | 0.08                                                                                | 32%                                | 32%                                              |
| (gly) <sub>4</sub>                       | 0.46                                          | 55%                                                            | 5.4                                                                                                  | 0.06                                                                                | 23%                                | 13%                                              |
| (gly) <sub>5</sub>                       | 0.46                                          | 55%                                                            | 2.2                                                                                                  | 0.02                                                                                | 9%                                 | 5%                                               |
| gly-pro                                  | 0.48                                          | >100%                                                          | 10.8                                                                                                 | 0.12                                                                                | 25%                                | 25%                                              |
| gly-lys                                  | 0.46                                          | >100%                                                          | 3.8                                                                                                  | 0.04                                                                                | 9%                                 | 9%                                               |
| gly-gly-lys                              | 0.60                                          | >100%                                                          | 2.7                                                                                                  | 0.03                                                                                | 5%                                 | 5%                                               |
| gly-lys(lys) <sub>2</sub>                | 0.46                                          | >100%                                                          | 3.2                                                                                                  | 0.04                                                                                | 8%                                 | 8%                                               |
| acetyl                                   | 0.20                                          | 85%                                                            | 12.6                                                                                                 | 0.16                                                                                |                                    | 68%                                              |
| C16                                      | 0.20                                          | 95%                                                            | 8.0                                                                                                  | 0.09                                                                                |                                    | 43%                                              |
| Multiple modifications                   |                                               |                                                                |                                                                                                      |                                                                                     |                                    |                                                  |
| 3 x 2'-amino-LNA                         | 0.20                                          | 78%                                                            | 1.4                                                                                                  | 0.02                                                                                |                                    | 8%                                               |
| 3 x acetyl                               | 0.20                                          | 76%                                                            | 8.8                                                                                                  | 0.10                                                                                |                                    | 48%                                              |
| 3 x C16                                  | 0.20                                          | 91%                                                            | 15.4                                                                                                 | 0.17                                                                                |                                    | 83%                                              |
| 3 x gly                                  | 0.20                                          | 77%                                                            | 3.4                                                                                                  | 0.04                                                                                |                                    | 18%                                              |
| Complementary strands with modifications |                                               |                                                                |                                                                                                      |                                                                                     |                                    |                                                  |
| 2 x 2'-amino-LNA                         | 0.20                                          | 77%                                                            | 3.0                                                                                                  | 0.03                                                                                |                                    | 17%                                              |
| 2 x gly                                  | 0.20                                          | 46%                                                            | 2.9                                                                                                  | 0.03                                                                                |                                    | 16%                                              |

### **S3 - NMR spectra**

Conditions as described in journal article

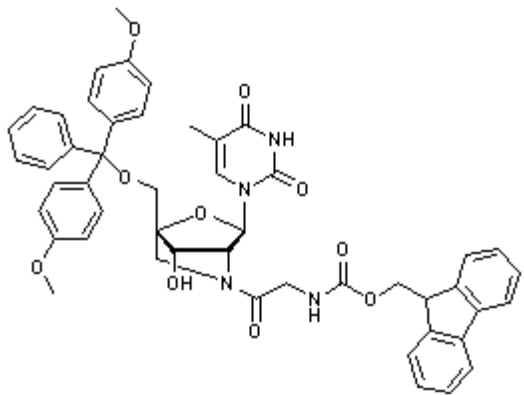

Compound **2a**

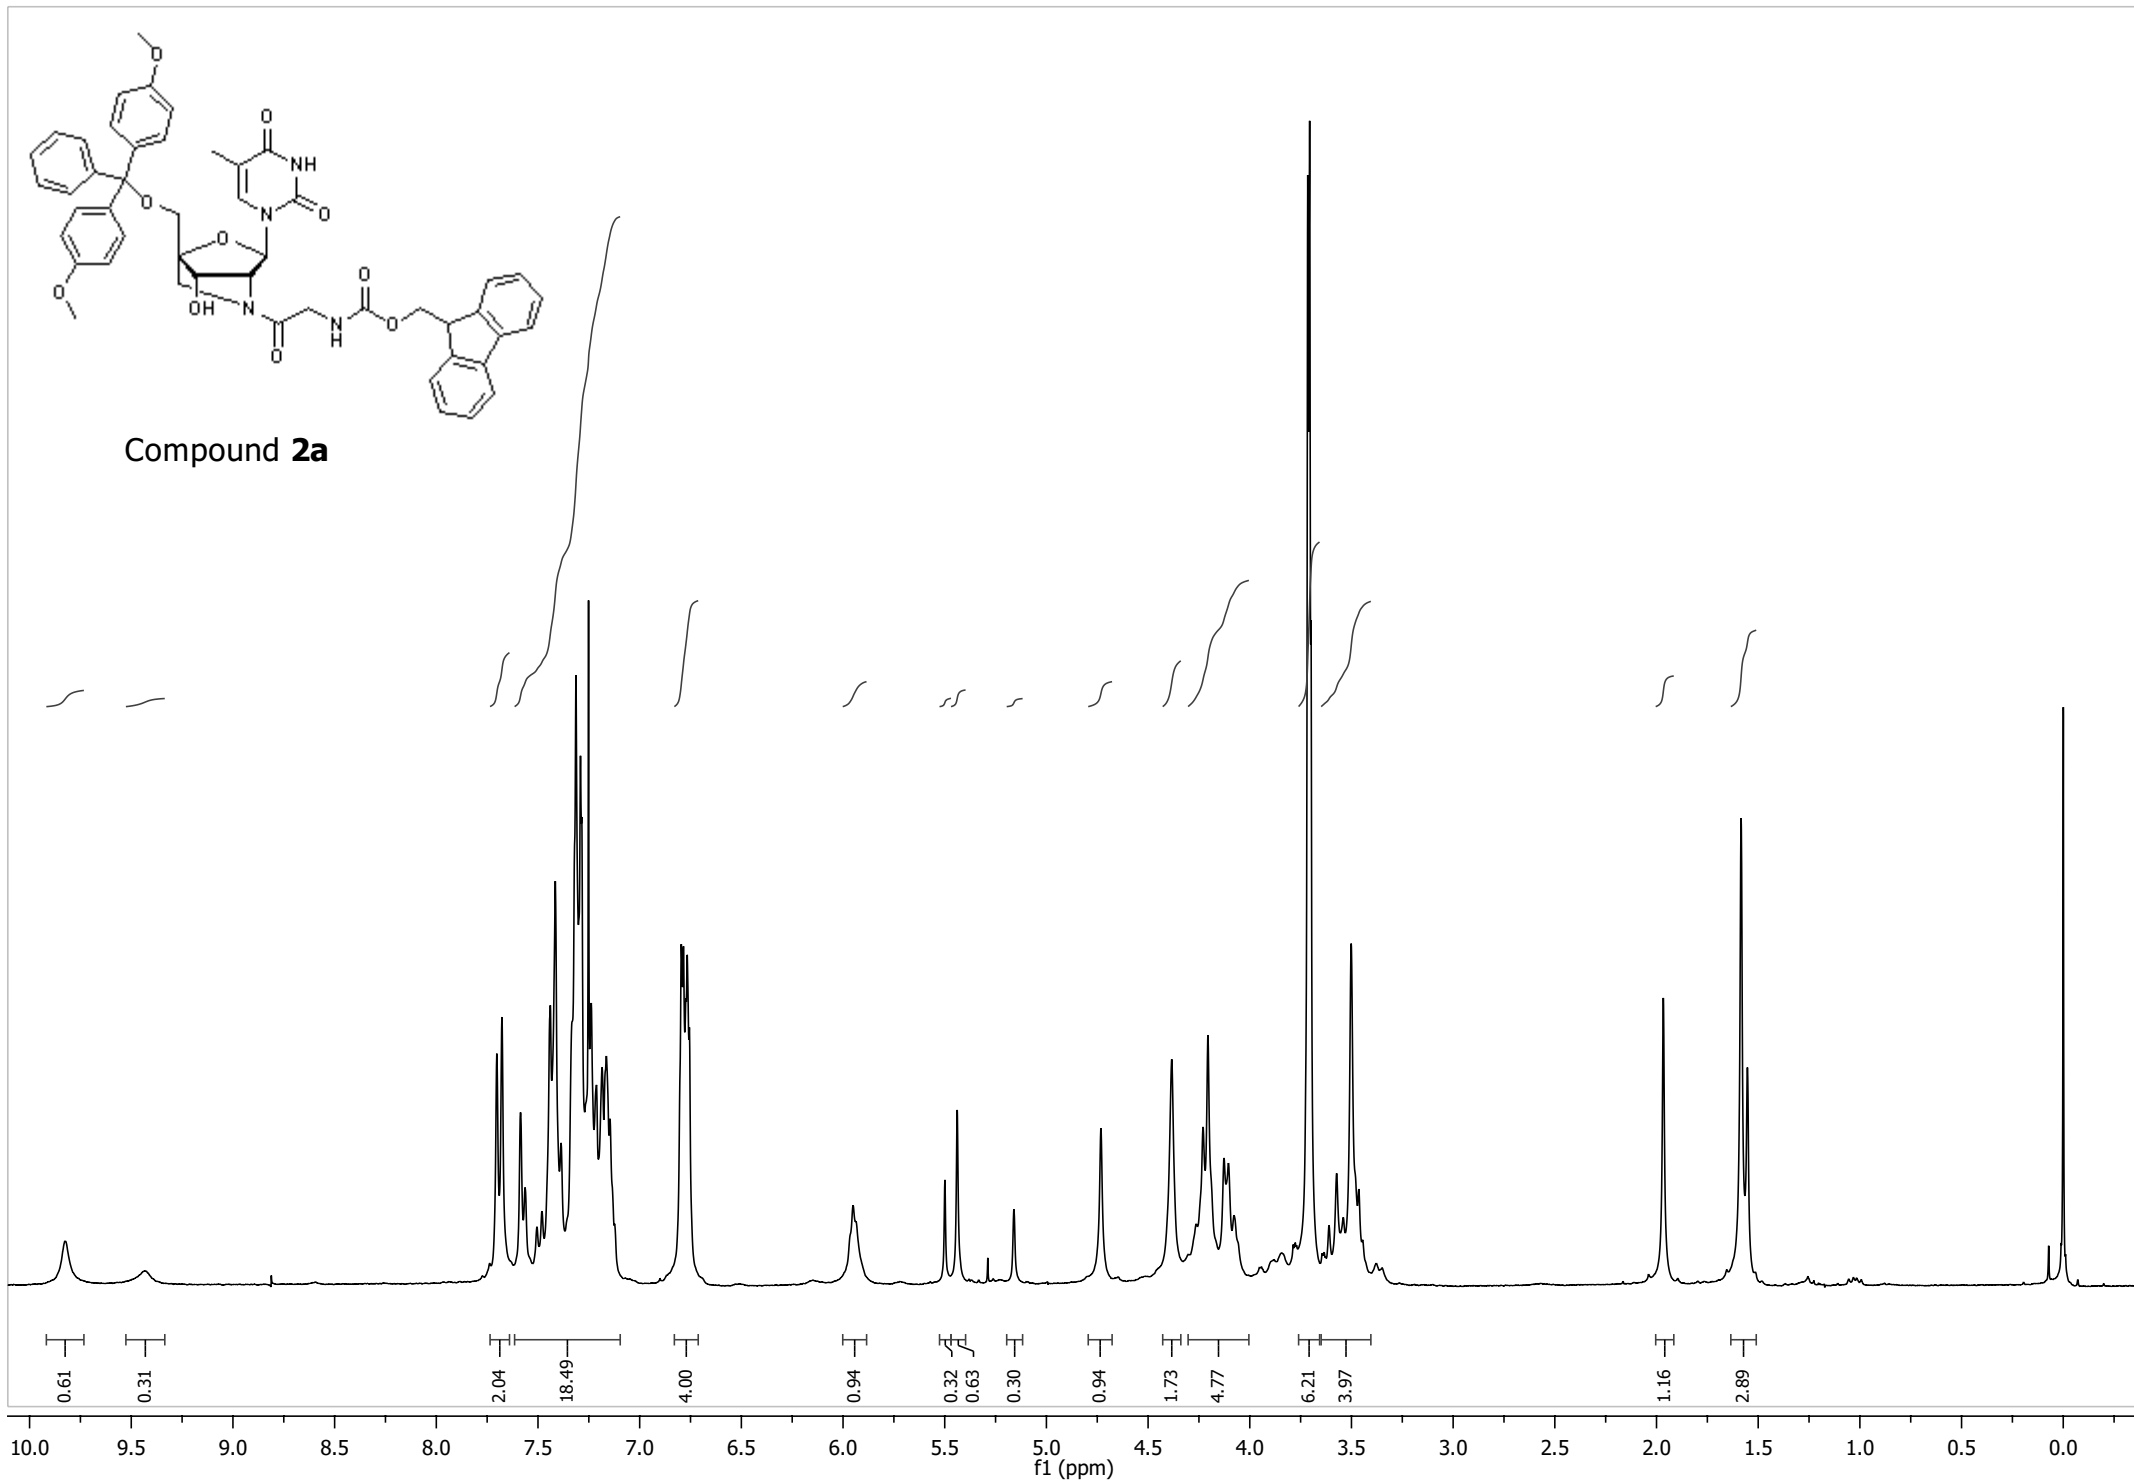

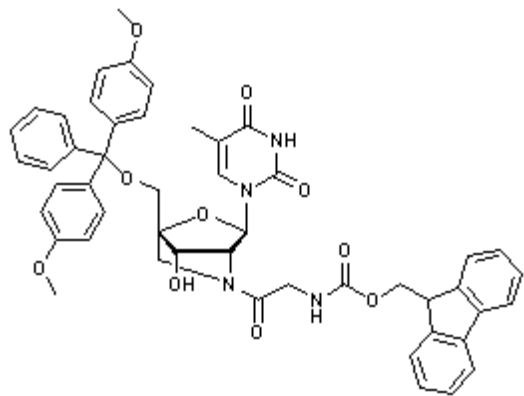

Compound **2a**

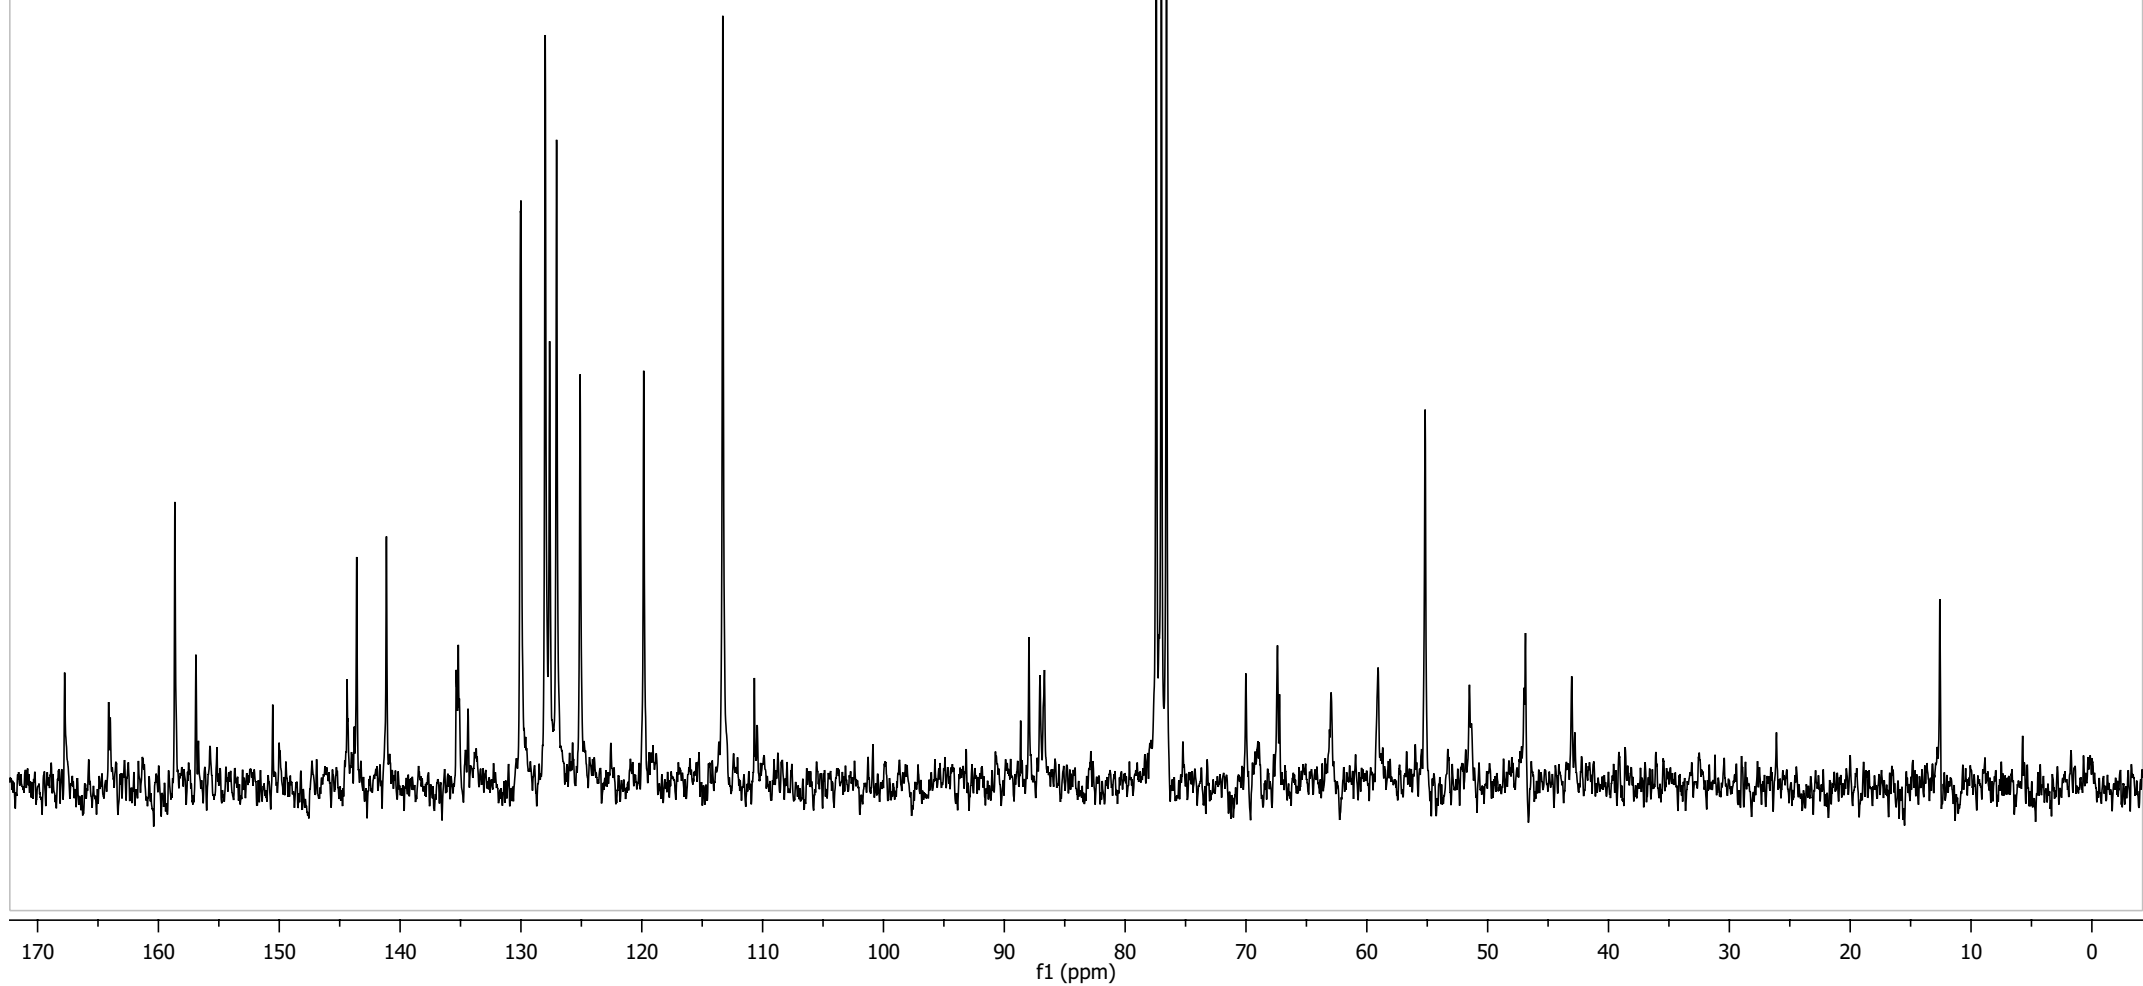

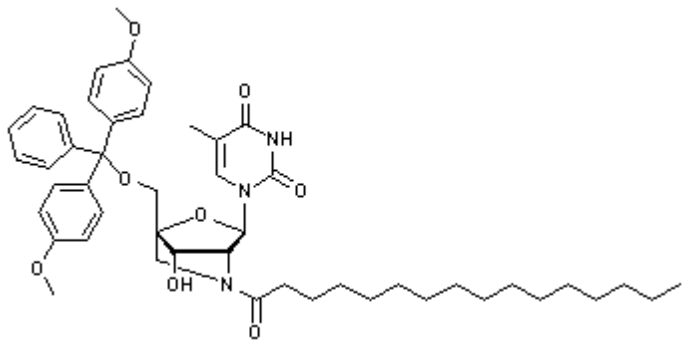

Compound **2b**

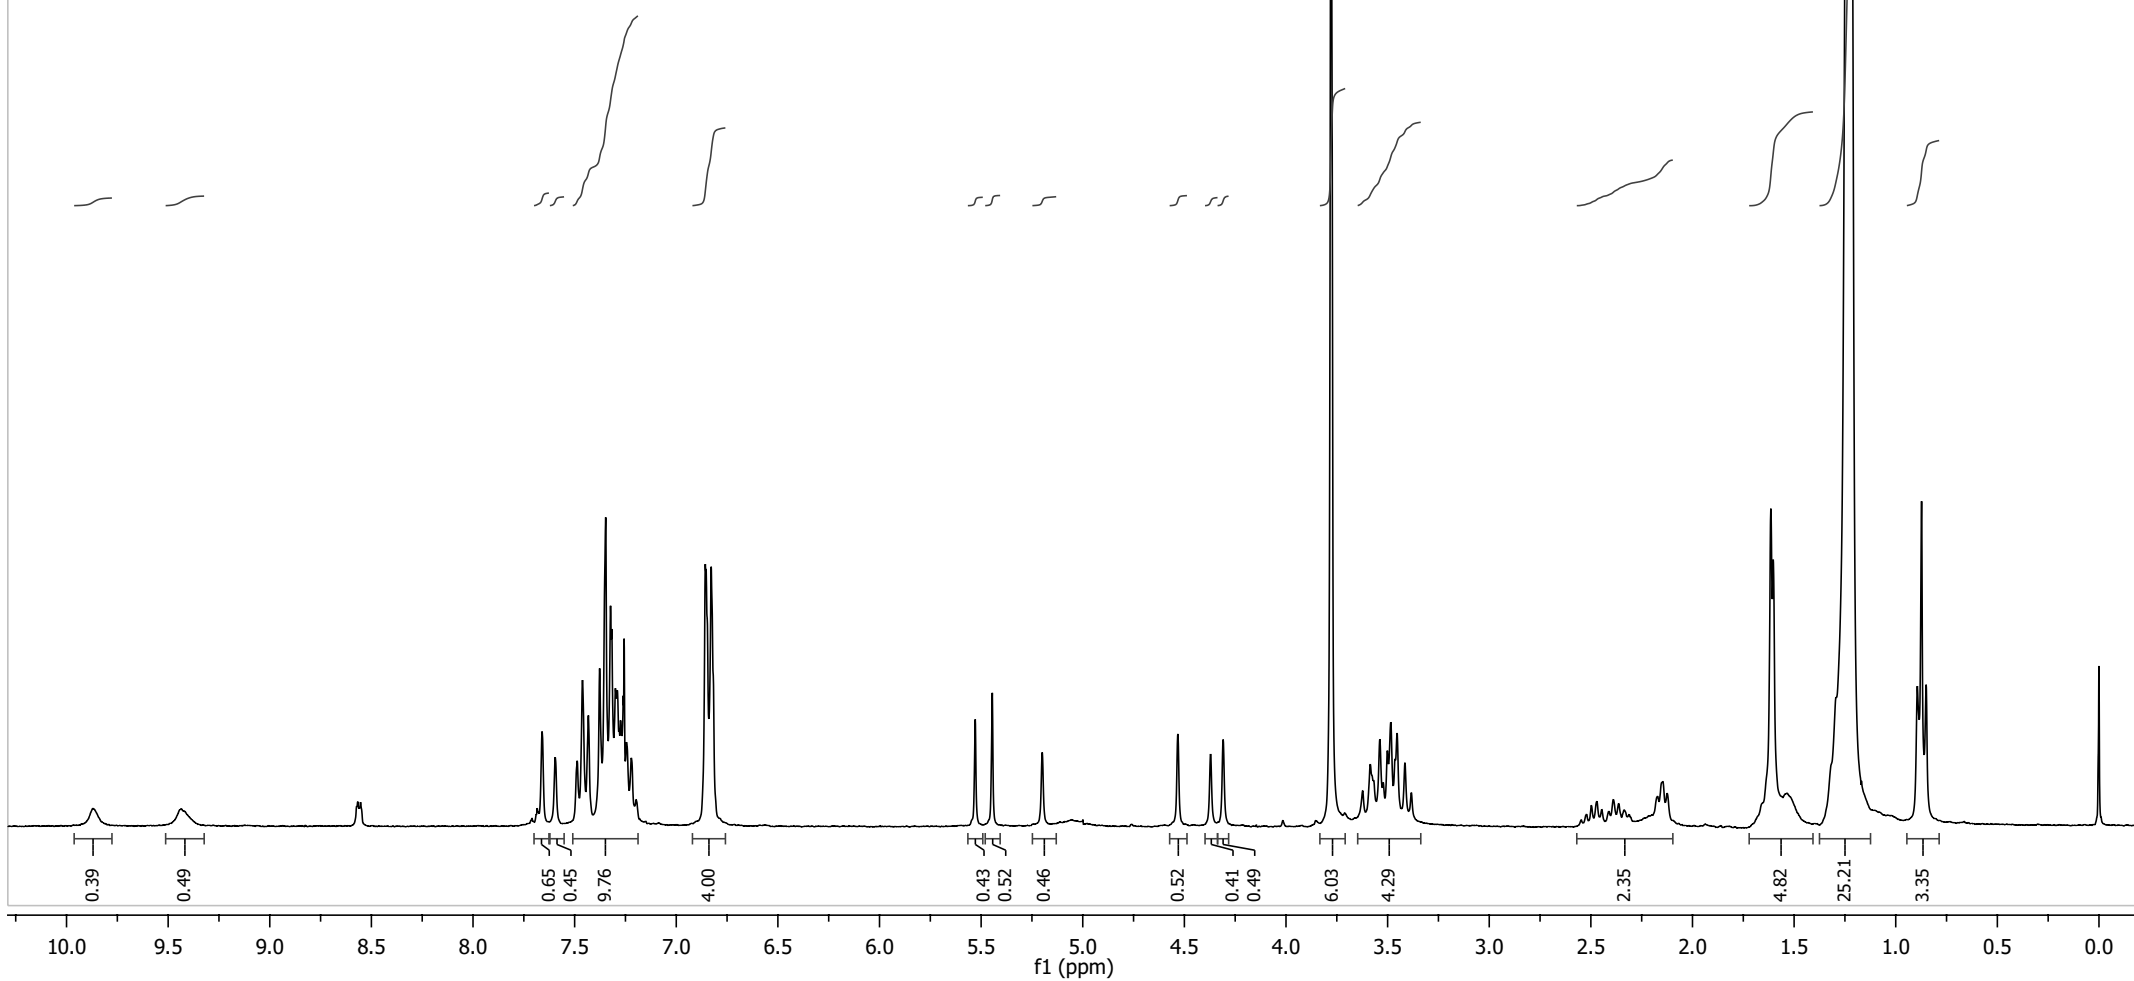

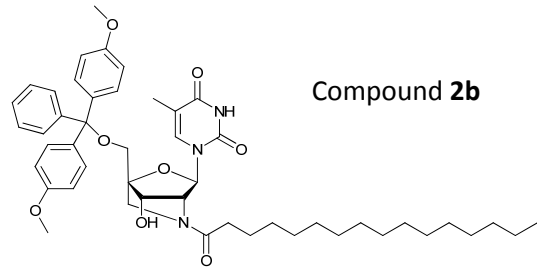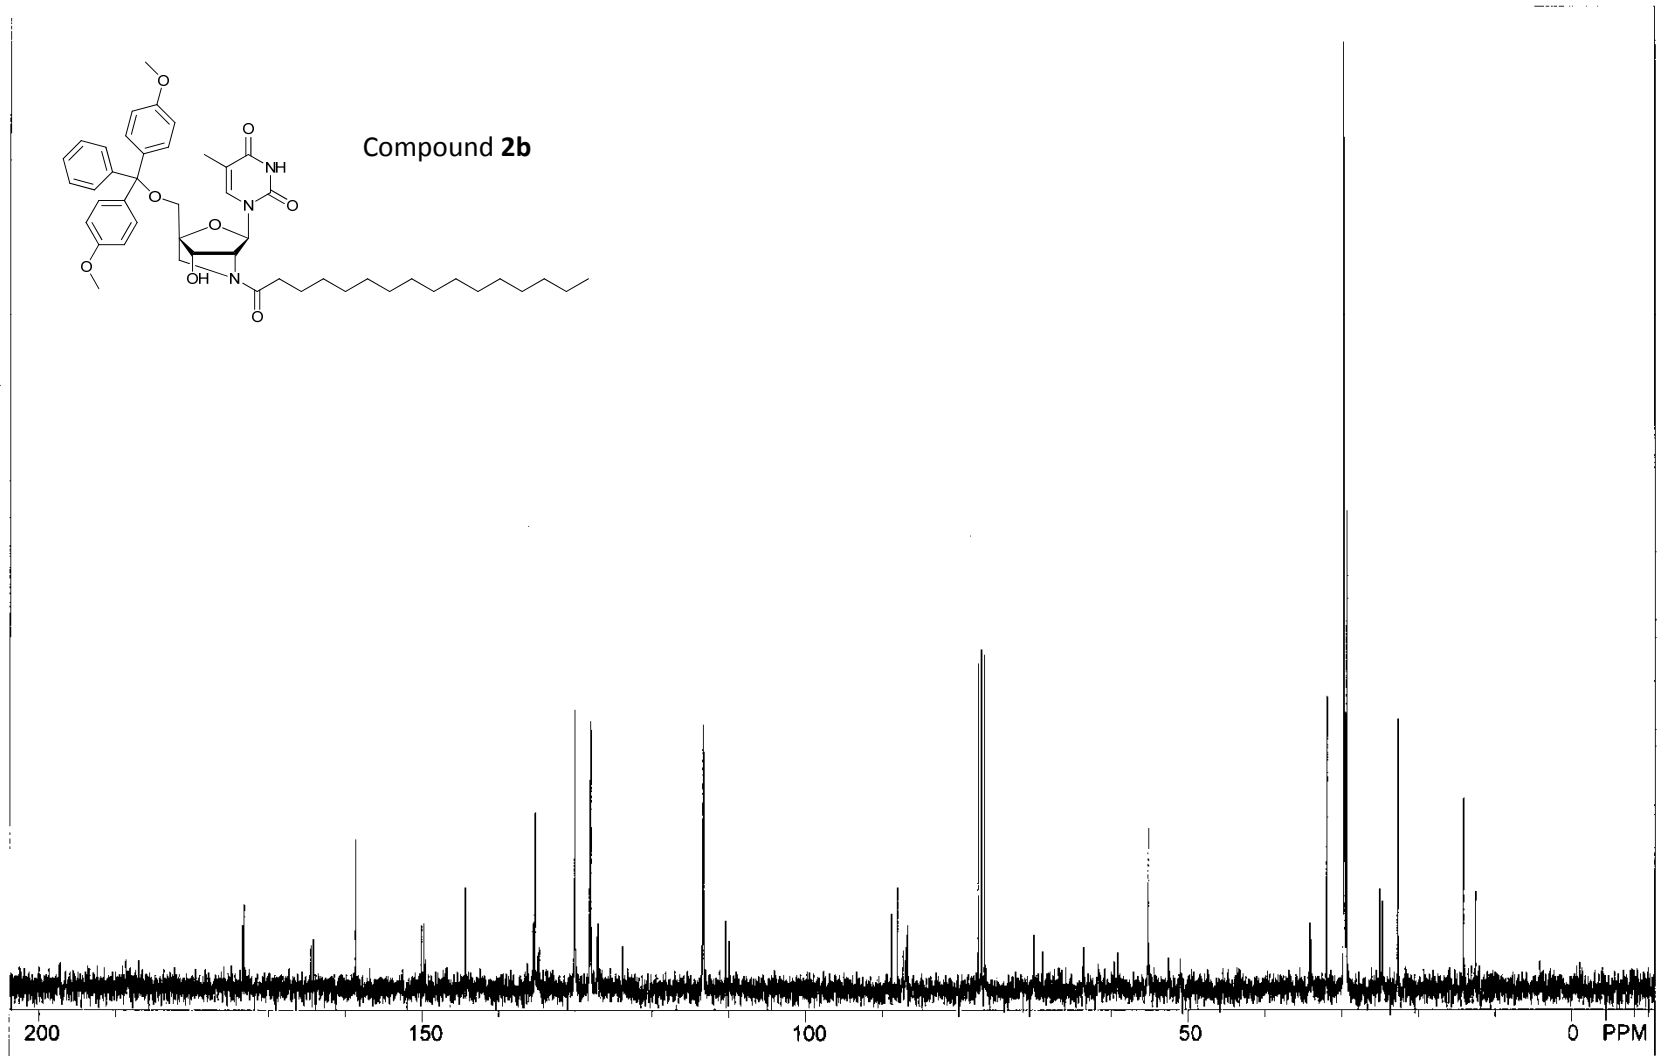



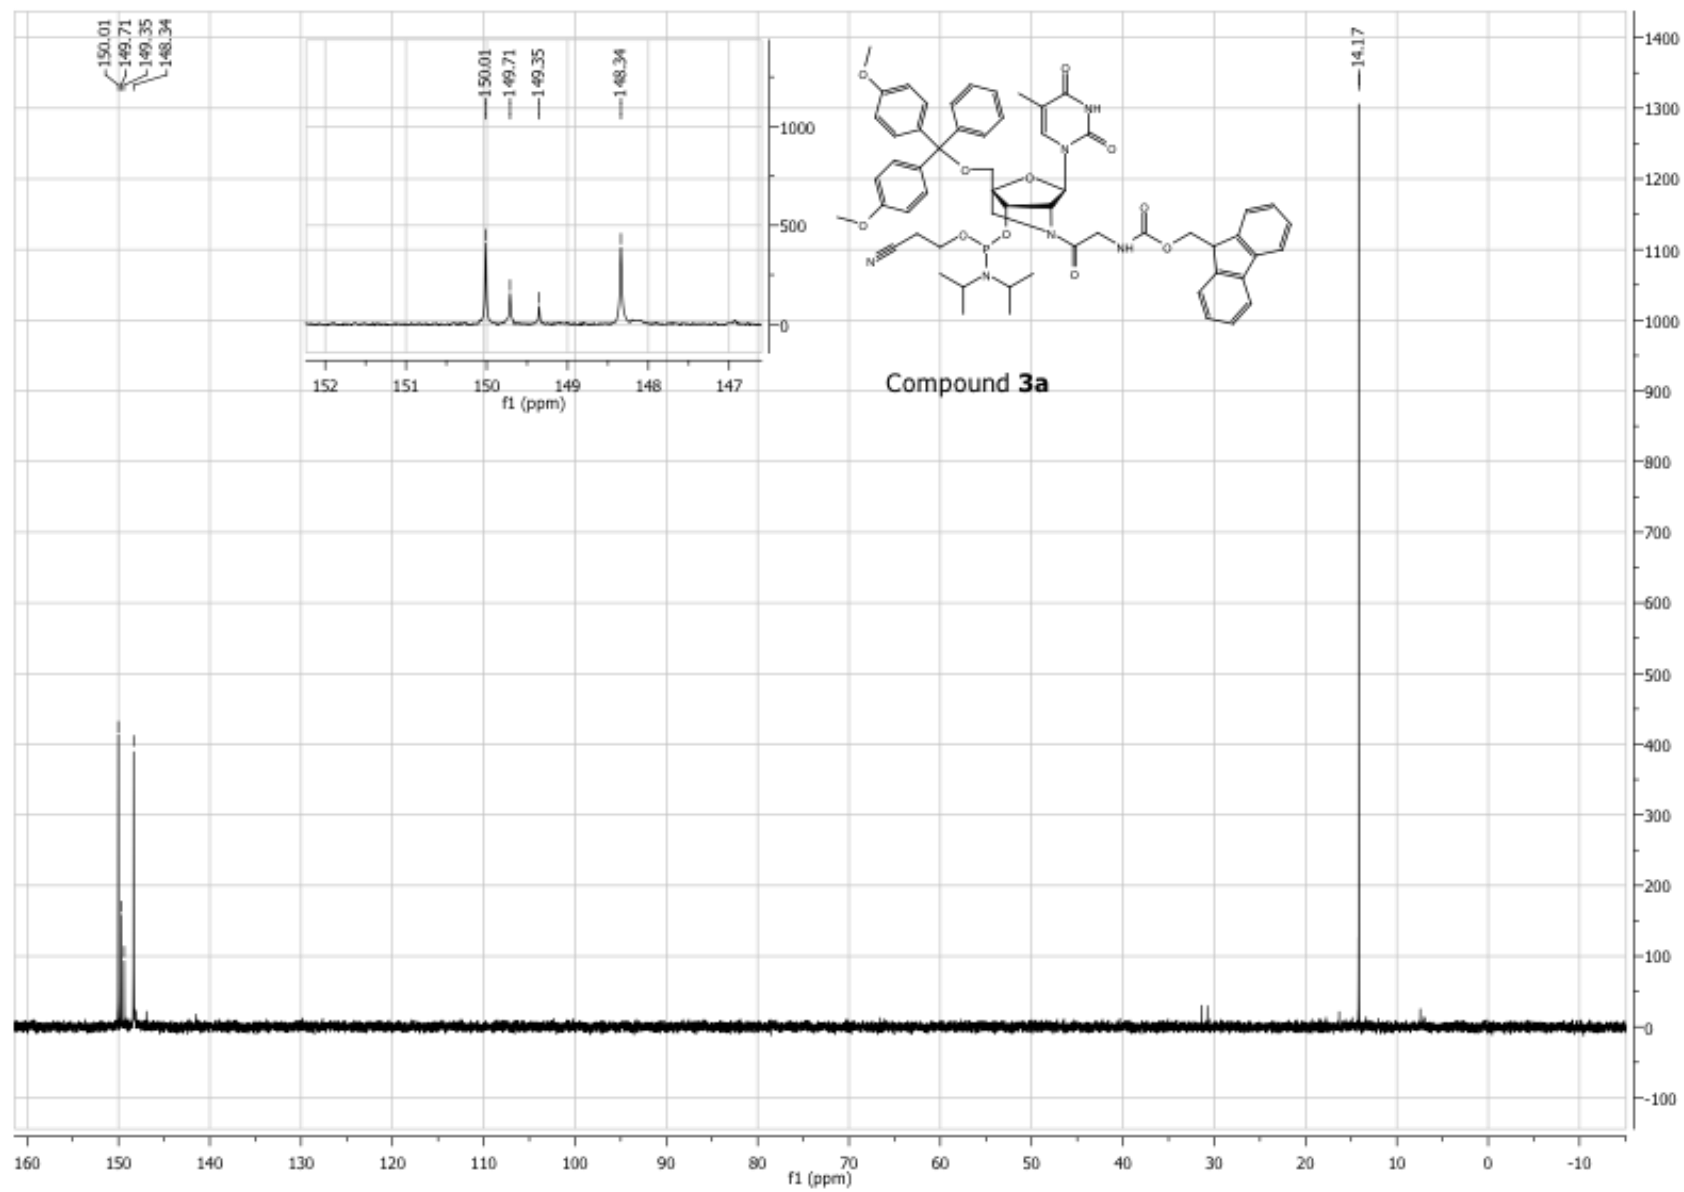

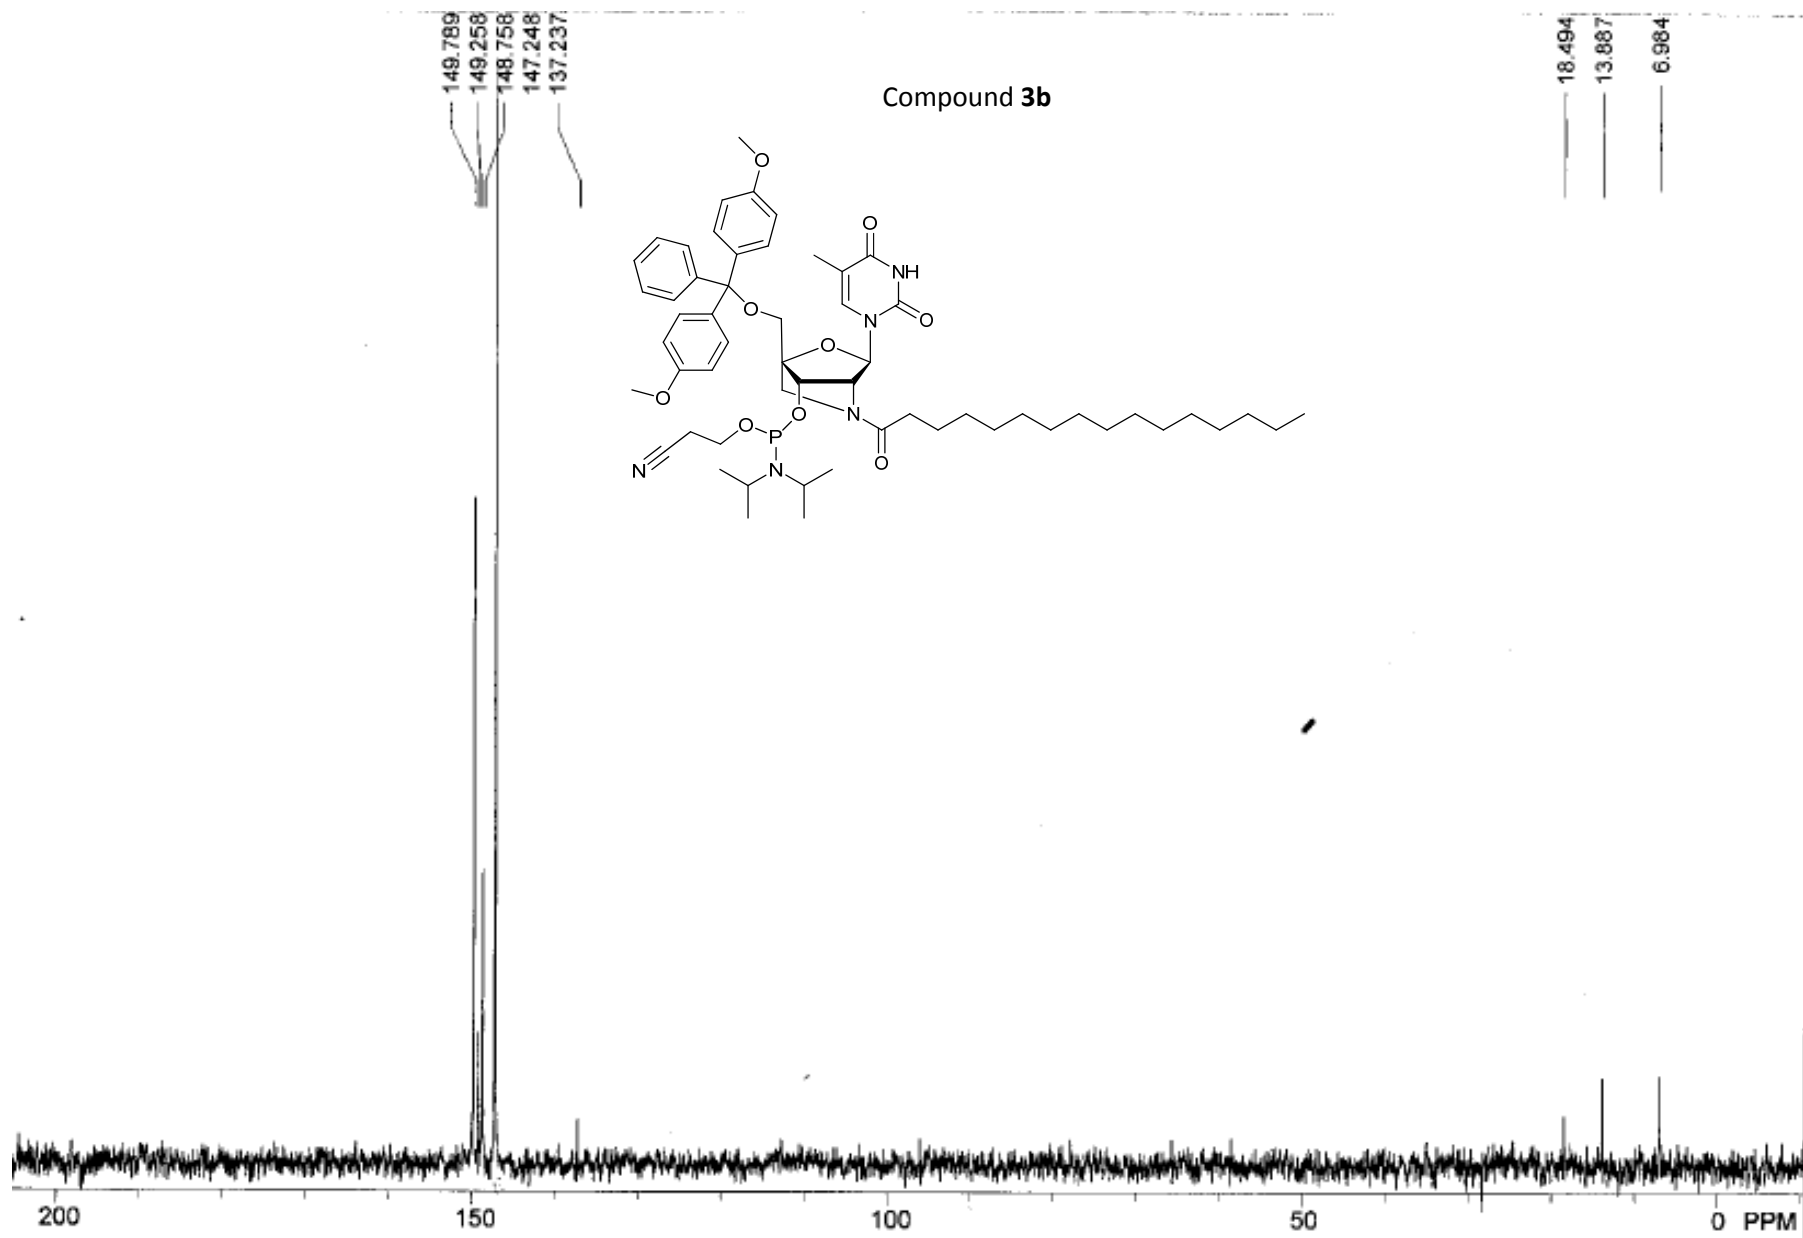

Supplement: c0ob00532k.pdf [file c0ob00532k.pdf]
